# Supplementary material for: Heat Stress Trends in Regions of Intensive Turkey Production in Germany—A Challenge in Times of Climate Change
Source: MDPI journal article supplement (doi:10.3390/ani14010072), 2023-12-24
Supplement: s1 [file s1]

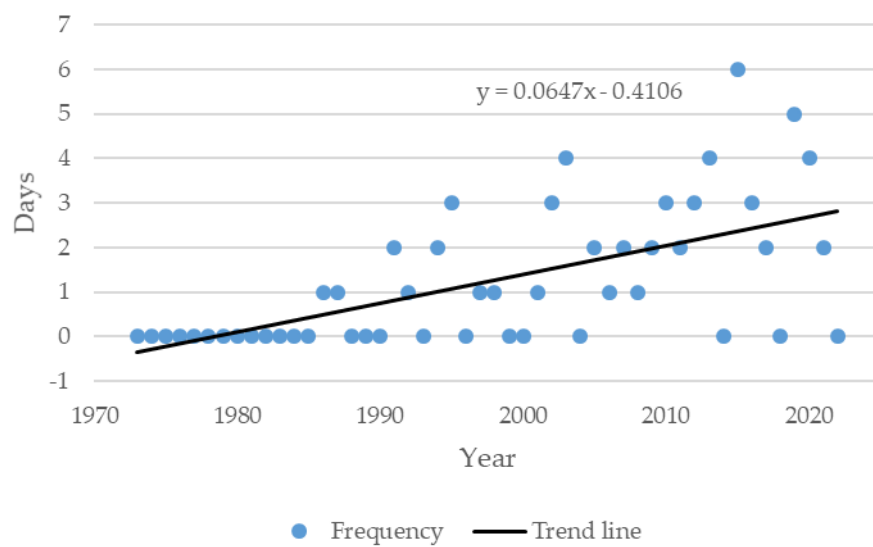

**Figure S1.** Number of days of exceeded threshold concerning enthalpy values ( $\geq 67$  kJ/kg) in Kleve (from 1973 to 2022).
