# Supplementary material for: Heat Stress Trends in Regions of Intensive Turkey Production in Germany—A Challenge in Times of Climate Change
Source: MDPI journal article supplement (doi:10.3390/ani14010072), 2023-12-24
Supplement: s1 [file s1]

**Table S1.** Location of weather stations (data provided by the German weather service (Deutscher Wetterdienst). The number of turkeys and farms are listed for each district [11].

| <b>District</b>             | <b>Weather Station</b>   | <b>Number of turkeys</b> | <b>Turkey farms</b> |
|-----------------------------|--------------------------|--------------------------|---------------------|
| Osnabrück                   | Alfhausen                | 151,356                  | 13                  |
| Nordwestmecklenburg         | Boltenhagen              | 24,710                   | 4                   |
| Diepholz                    | Diepholz                 | 206,577                  | 21                  |
| Emsland                     | Dörpen                   | 548,803                  | 34                  |
| Cloppenburg                 | Friesoythe-Altenoythe    | 2,043,811                | 107                 |
| Altmarkkreis Salzwedel      | Gardelegen               | 348,005                  | 12                  |
| Oldenburg                   | Großenkneten             | 915,344                  | 55                  |
| Rosenheim                   | Kiefersfelden-Gach       | 144,633                  | 23                  |
| Kleve                       | Kleve                    | 485,338                  | 30                  |
| Märkisch-Oderland           | Müncheberg               | 178,191                  | 11                  |
| Nienburg (Weser)            | Nienburg                 | 139,407                  | 8                   |
| Rotenburg (Wümme)           | Rotenburg (Wümme)        | 257,659                  | 17                  |
| Ansbach                     | Rothenburg ob der Tauber | 156,683                  | 30                  |
| Vorpommern-Greifswald       | Ueckermünde              | 212,944                  | 9                   |
| Mecklenburgische Seenplatte | Waren (Müritz)           | 81,349                   | 10                  |
|                             | Total                    | 5,894,810                | 384                 |
