# Supplementary material for: Heat Stress Trends in Regions of Intensive Turkey Production in Germany—A Challenge in Times of Climate Change
Source: MDPI journal article supplement (doi:10.3390/ani14010072), 2023-12-24
Supplement: s1 [file s1]

**Table S2.** Gradients of the trend line equation for the enthalpy values and temperature-humidity index (THI) for each weather station. Gradients indicate the average increase from year to year as the gradient corresponds to the annual increase in days.

| <b>Weather Station</b>   | <b>Enthalpy</b> | <b>THI</b> |
|--------------------------|-----------------|------------|
| Alfhausen                | 0.0249          | 0.0818     |
| Boltenhagen              | 0.0104          | 0.0378     |
| Diepholz                 | 0.0136          | 0.0978     |
| Dörpen                   | 0.0369          | 0.0985     |
| Friesoythe-Altenoythe    | 0.0093          | 0.1019     |
| Gardelegen               | 0.0095          | 0.2091     |
| Großenkneten             | 0.0561          | 0.1851     |
| Kiefersfelden-Gach       | 0.0572          | 0.2602     |
| Kleve                    | 0.0647          | 0.1692     |
| Müncheberg               | 0.0197          | 0.2252     |
| Nienburg                 | 0.0294          | 0.1381     |
| Rotenburg (Wümme)        | 0.0069          | 0.0725     |
| Rothenburg ob der Tauber | 0.0077          | 0.2274     |
| Ueckermünde              | 0.0498          | 0.0987     |
| Waren (Müritz)           | 0.0213          | 0.1366     |
| average                  | 0.0275          | 0.1427     |
